# Supplementary material for: Antagonizing miR-218-5p attenuates Wnt signaling and reduces metastatic bone disease of triple negative breast cancer cells
Source: PubMed Central journal article supplement (PMC5346696; doi:10.18632/oncotarget.12593), 2016-10-12
Supplement: oncotarget-07-79032-s001.pdf [file oncotarget-07-79032-s001.pdf]

## Antagonizing miR-218-5p attenuates Wnt signaling and reduces metastatic bone disease of triple negative breast cancer cells

### SUPPLEMENTARY FIGURES

**A**

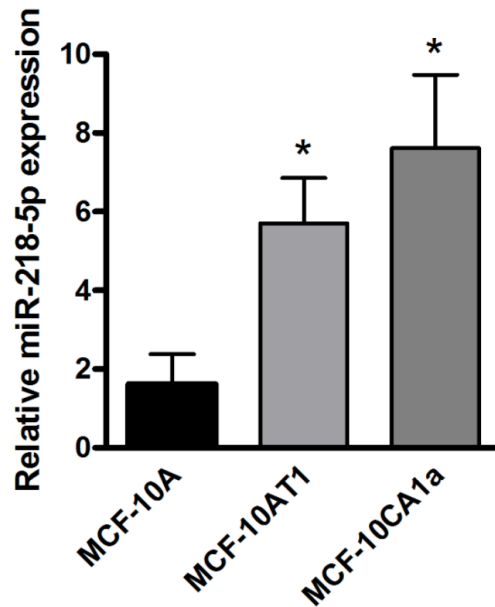

**Supplementary Figure S1: miR-218-5p expression is increased in malignant epithelial cells.** Expression of miR-218-5p was determined in non-malignant epithelial MCF-10A cells, premalignant MCF-10AT1 cells and malignant MCF-10CA1 cells by qRT-PCR. N = 3 independent experiments. Three biological replicates from different passages were used for each cell line. Mean values ± SEM, \*p<0.05.

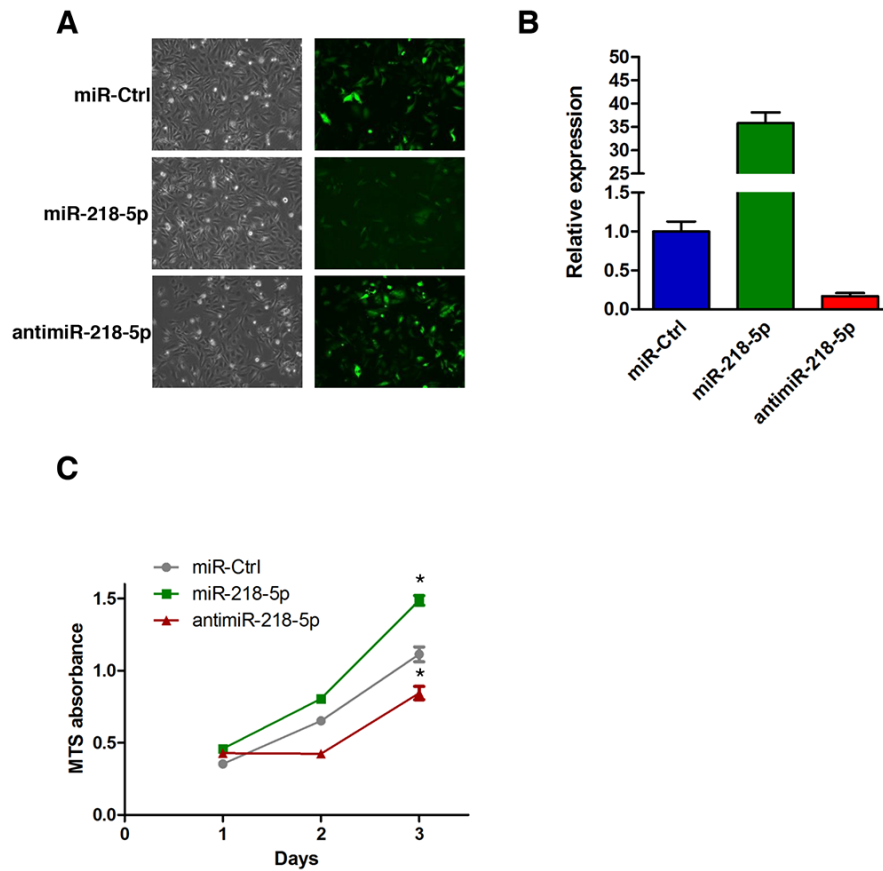

**Supplementary Figure S2: Stable expression of miR-218-5p or anti-miR-218-5p alters breast cancer cell proliferation.**

**A.** MDA-MB-231 cells were infected with lentiviral vectors containing GFP and miR-218-5p or anti-miR-218-5p. Cell morphology was determined by phase contrast microscopy. GFP signal was observed with epifluorescence microscopy. **B.** MDA-MB-231 cells were transfected with control, miR-218-5p or anti-miR-218-5p oligonucleotides. miR-218-5p expression was determined by qRT-PCR. **C.** Cell proliferation was analyzed in lentivirus infected cells with an MTS Assay. N= 3 independent experiments. Mean values  $\pm$  SEM, \* $p$ <0.05.

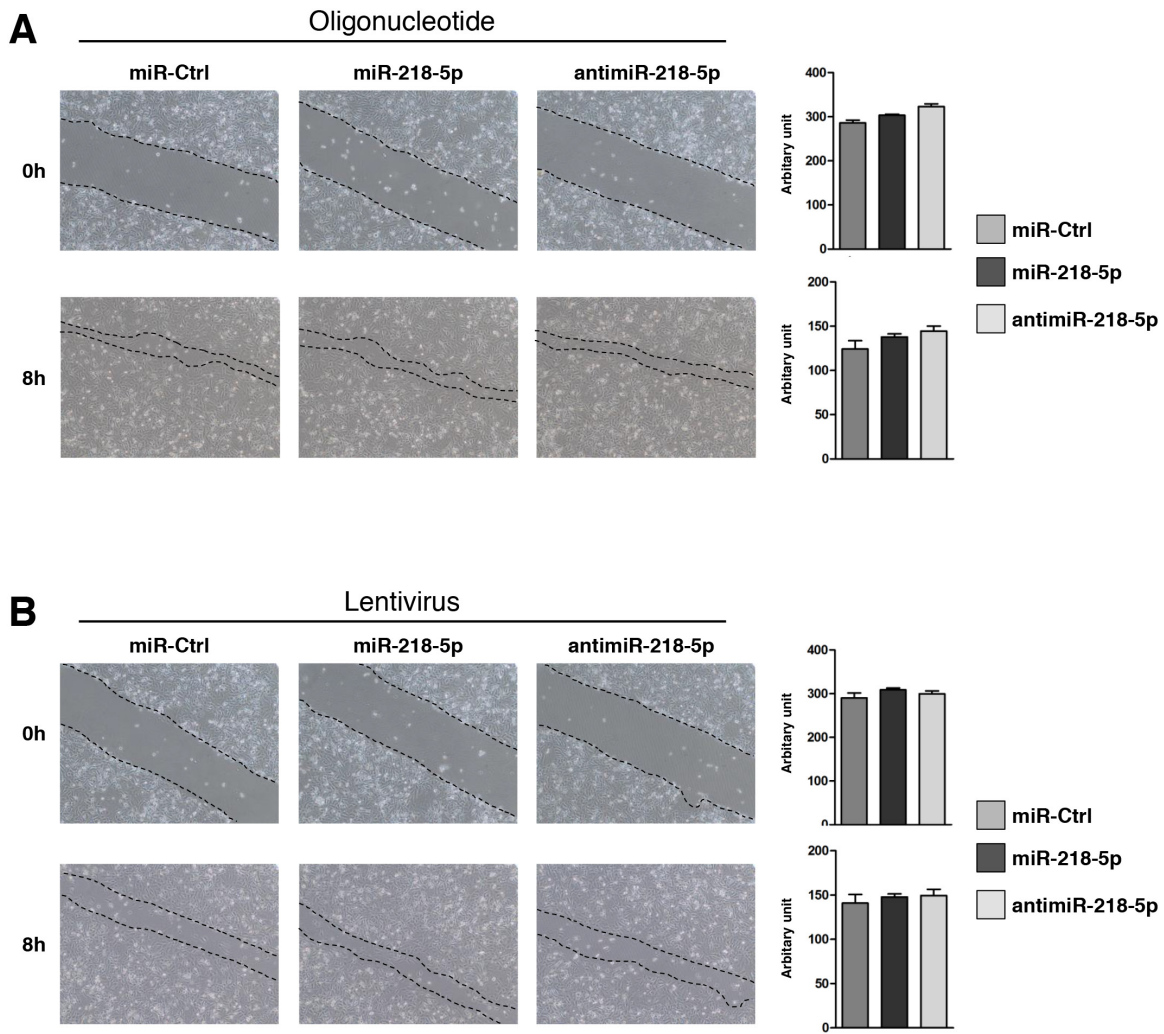

**Supplementary Figure S3: miR-218-5p does not affect breast cancer cell migration.** **A.** Wound healing assay using MDA-MB-231 cells transfected with miR-218-5p or antimiR-218-5p oligos. Pictures were captured immediately and 8 hours after the wound was applied and wound width was quantified using ImageJ. **B.** Migration of MDA-MB-231 cells stably expressing miR-218-5p or antimiR-218-5p. N= 3 independent experiments. Mean values  $\pm$  SEM.

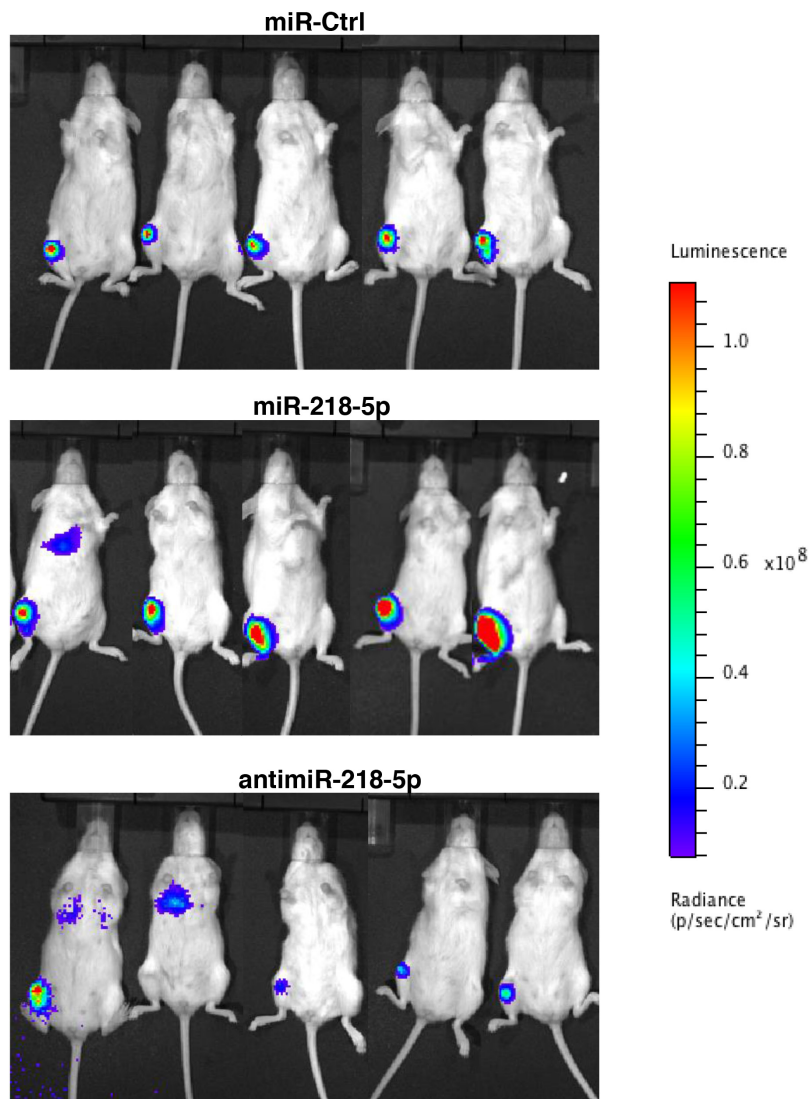

**Supplementary Figure S4: AntimiR-218-5p treatment reduces tumor growth in bone.** MDA-MB-231 cells stably expressing luciferase were transfected with miR-218-5p, antimiR-218-5p or control miRNA (miR-Ctrl) oligonucleotides and transplanted into the tibiae of immunocompromised mice. Tumor growth was visualized after four weeks by bioluminescence imaging.

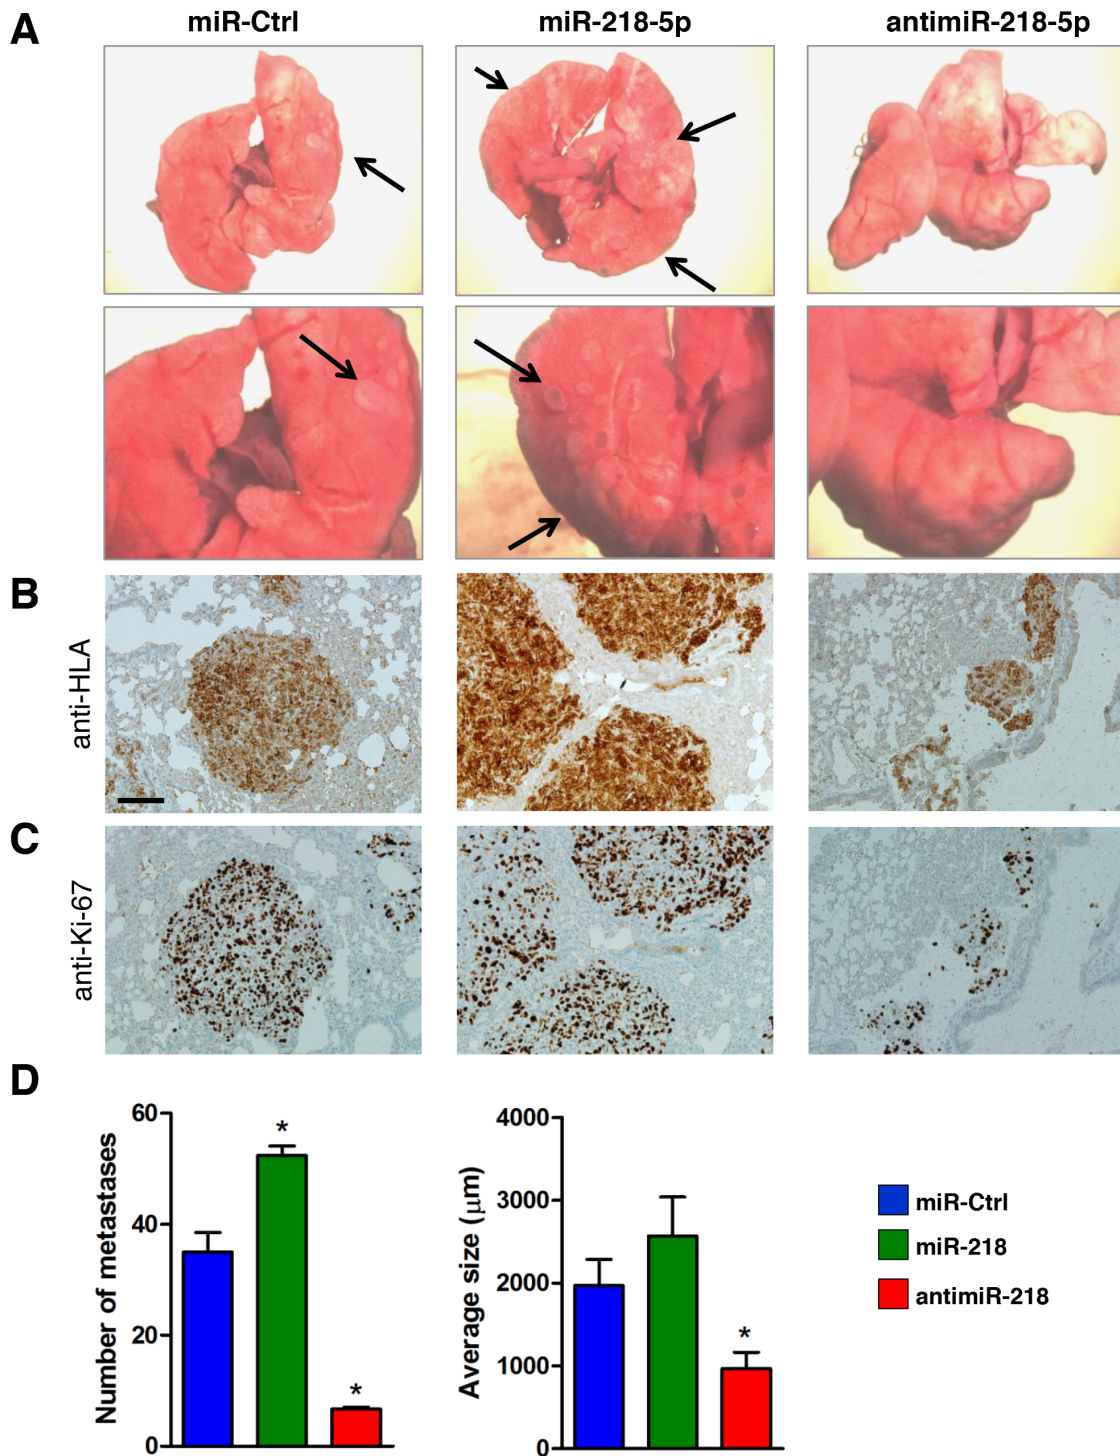

**Supplementary Figure S5: AntimiR-218-5p reduces lung metastasis.** **A.** Images were taken from mouse lungs using a stereomicroscope (top panels). Detection of metastatic nodules indicated by arrows in (A), originating from implanted human breast cancer cells using a immunohistochemical staining against human specific anti-HLA **B.** and Ki-67 **C.** Scale bar indicates 200  $\mu\text{m}$ . **D.** The number and average size of metastatic nodules was quantified with Osteomeasure. N=6 mice/group. Mean values  $\pm$  SEM, \* $p < 0.05$ .

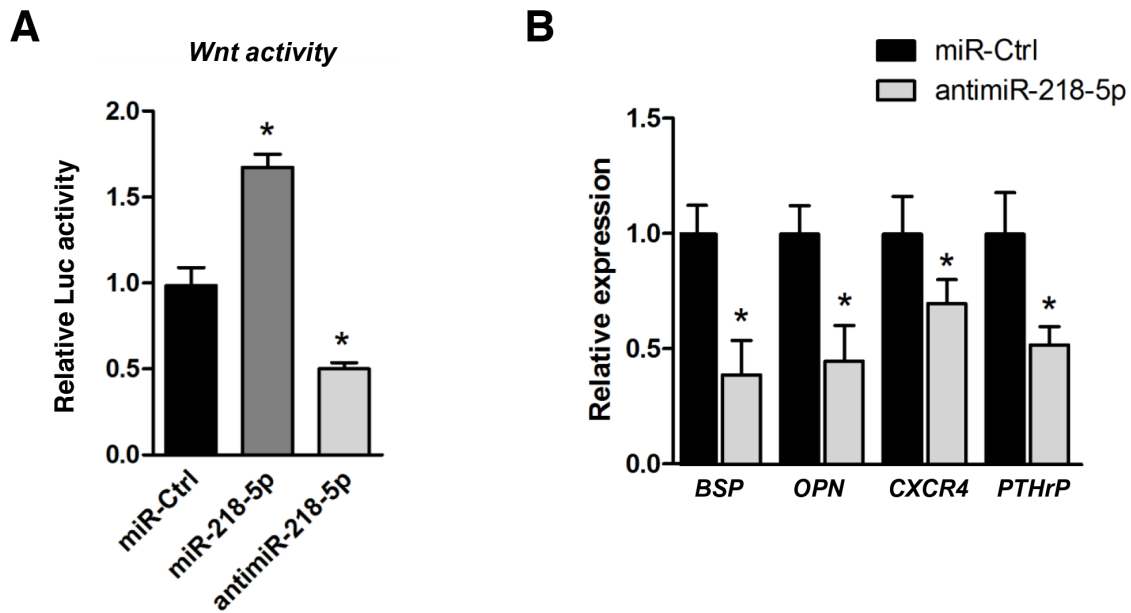

**Supplementary Figure S6: AntimiR-218-5p reduces Wnt activity and the expression of metastasis-related Wnt target genes.** **A.** Wnt signaling was determined in MDA-MB-231 cells stably expressing miR-218-5p or antimiR-218-5p by TopFlash Assay. **B.** Expression of Wnt target genes was analyzed by qRT-PCR in MDA-MB-231 cells transfected with antimiR-218-5p. N= 3-4 independent experiments. Mean values  $\pm$  SEM, \* $p < 0.05$ .
